# Supplementary material
Source: ML conference proceedings conference paper supplement (https://proceedings.neurips.cc/paper_files/paper/2021/hash/d811406316b669ad3d370d78b51b1d2e-Abstract.html)
Supplement: Supplementary file 1 [file d811406316b669ad3d370d78b51b1d2e-Supplemental.zip]

Archive with 2 entries (2 files):
- idad_supplement.pdf
- __MACOSX/._idad_supplement.pdf
